# Supplementary material for: Expansion of human megakaryocyte-biased hematopoietic stem cells by biomimetic Microniche
Source: PubMed Central journal article supplement (PMC10113370; doi:10.1038/s41467-023-37954-3), 2023-04-18
Supplement: 41467_2023_37954_MOESM1_ESM.pdf [file 41467_2023_37954_MOESM1_ESM.pdf]

## **SUPPLEMENTARY INFORMATION**

### **Expansion of Human Megakaryocyte-biased Hematopoietic Stem Cells by Biomimetic Microniche**

Yinghui Li et al.

Figure S1

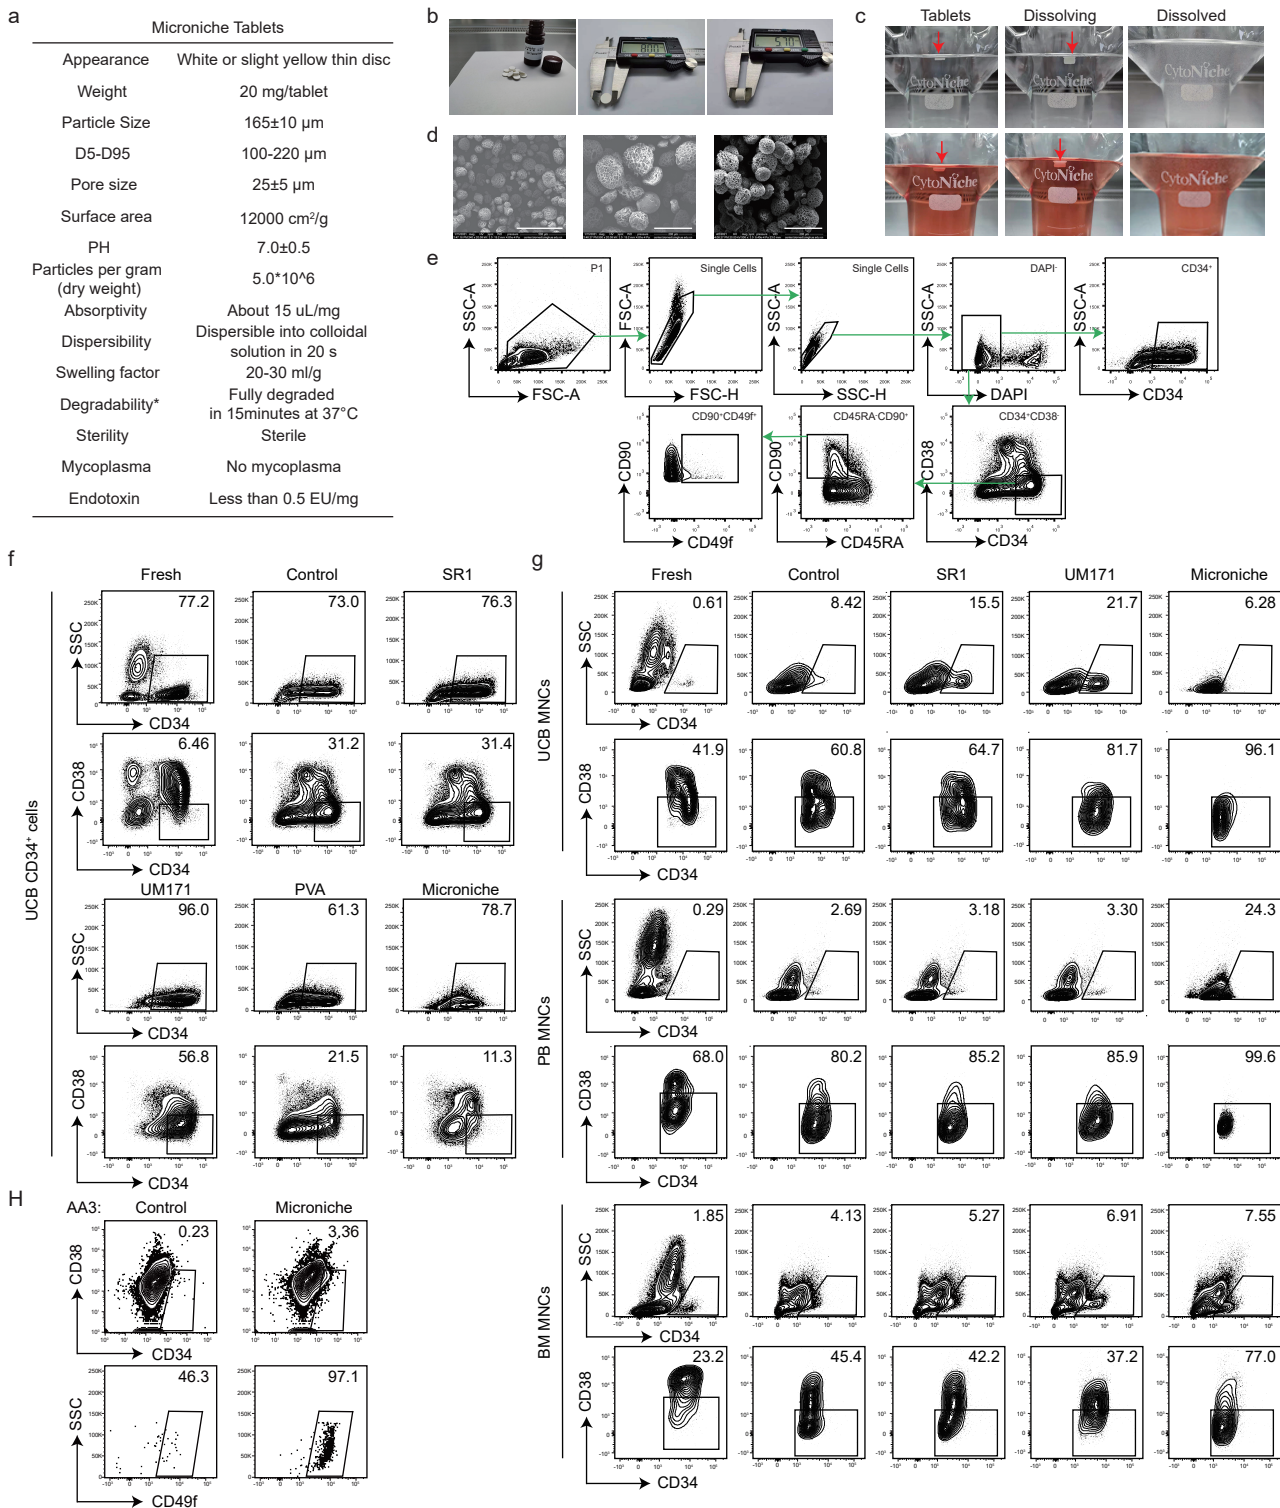

**Supplementary Figure 1. Characters of Microniche and *in vitro* culture data with Microniche.** **a** Physical parameters of Microniche tablets. \*Digested by 3D FloTrix® Digest. **b** Appearance and size of Microniche tablets. The diameter and thickness of the tablets were measured using an electronic digital caliper. The graphs represent a mean of three independent measurements (10 replicates analysed in each). **c** Solubility diagram of Microniche tablets in PBS and cell culture medium. **d** Scanning electron microscope images of Microniche. Scale bar, 500  $\mu\text{m}$  (left) and 200  $\mu\text{m}$  (middle and right). **e** Flow cytometry gating strategies for HSPC and HSC subpopulations during *in vitro* culture. **f** Representative FACS profiles of CD34<sup>+</sup> and CD34<sup>+</sup>CD38<sup>-</sup> populations in UCB CD34<sup>+</sup> cells before (fresh) and after cultured in control medium or control medium supplemented with SR1 (1 $\mu\text{M}$ ), UM171 (40nM), PVA (0.1%) or Microniche. Fresh,  $n = 3$  technical replicates; Microniche,  $n = 3$  biological replicates; Other groups,  $n = 4$  biological replicates. **g** Representative FACS profiles of CD34<sup>+</sup> and CD34<sup>+</sup>CD38<sup>-</sup> populations in UCB, PB or BM MNCs before (fresh) and after culture in control medium, or control medium supplemented with SR1 (1 $\mu\text{M}$ ), UM171 (40nM) or Microniche. For BM and PB MNCs,  $n = 3$  biological replicates; for UCB MNCs, fresh  $n = 4$  technical replicates and other groups  $n = 3$  biological replicates. **h** Representative FACS profiles of CD34<sup>+</sup>CD38<sup>-</sup> and CD34<sup>+</sup>CD38<sup>-</sup>CD49f<sup>+</sup> populations derived from AA patient 3 after culture.

Figure S2

a

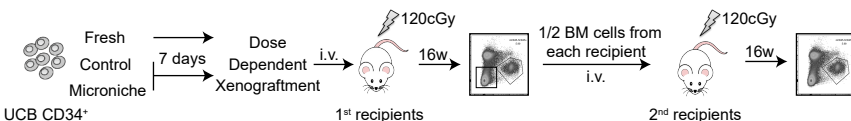

b

| Treatment  | Dose of starting CD34 <sup>+</sup> cells | Tested | 1 <sup>st</sup> Engrafted (2 <sup>nd</sup> Tested) | 2 <sup>nd</sup> Engrafted | 1 <sup>st</sup> Stem Cell Frequency and <i>P</i> -value | 2 <sup>nd</sup> Stem Cell Frequency and <i>P</i> -value |
|------------|------------------------------------------|--------|----------------------------------------------------|---------------------------|---------------------------------------------------------|---------------------------------------------------------|
| Fresh      | 100000                                   | 4      | 4                                                  | 4                         | 1/11994                                                 | 1/51557                                                 |
|            | 50000                                    | 4      | 3                                                  | 0                         |                                                         |                                                         |
|            | 10000                                    | 6      | 4                                                  | 2                         |                                                         |                                                         |
|            | 1000                                     | 11     | 2                                                  | 0                         |                                                         |                                                         |
|            | 100                                      | 12     | 2                                                  | 1                         |                                                         |                                                         |
|            | 10                                       | 6      | 0                                                  | 0                         |                                                         |                                                         |
| Control    | 50000                                    | 2      | 1                                                  | 0                         | 1/16624<br>(vs Fresh) 0.57                              | 1/116929<br>(vs Fresh) 0.405                            |
|            | 10000                                    | 2      | 2                                                  | 1                         |                                                         |                                                         |
|            | 2000                                     | 4      | 2                                                  | 0                         |                                                         |                                                         |
|            | 400                                      | 8      | 0                                                  | 0                         |                                                         |                                                         |
|            | 80                                       | 11     | 0                                                  | 0                         |                                                         |                                                         |
|            | 16                                       | 3      | 0                                                  | 0                         |                                                         |                                                         |
| Microniche | 100000                                   | 2      | 2                                                  | 1                         | 1/2394<br>(vs Fresh) 0.00172<br>(vs Control) 0.000804   | 1/68000<br>(vs Fresh) 0.67<br>(vs Control) 0.612        |
|            | 20000                                    | 6      | 6                                                  | 2                         |                                                         |                                                         |
|            | 4000                                     | 5      | 4                                                  | 1                         |                                                         |                                                         |
|            | 800                                      | 12     | 3                                                  | 0                         |                                                         |                                                         |
|            | 160                                      | 5      | 0                                                  | 0                         |                                                         |                                                         |
|            | 32                                       | 6      | 1                                                  | 0                         |                                                         |                                                         |

c

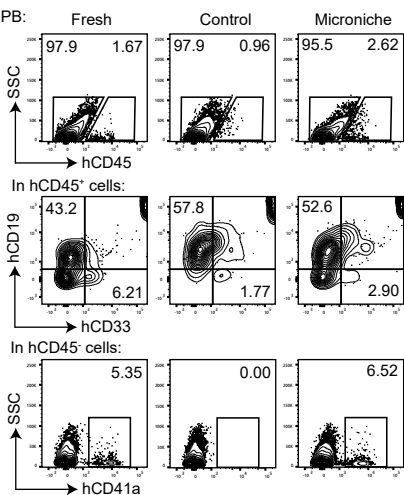

e

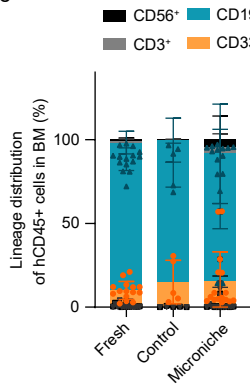

d

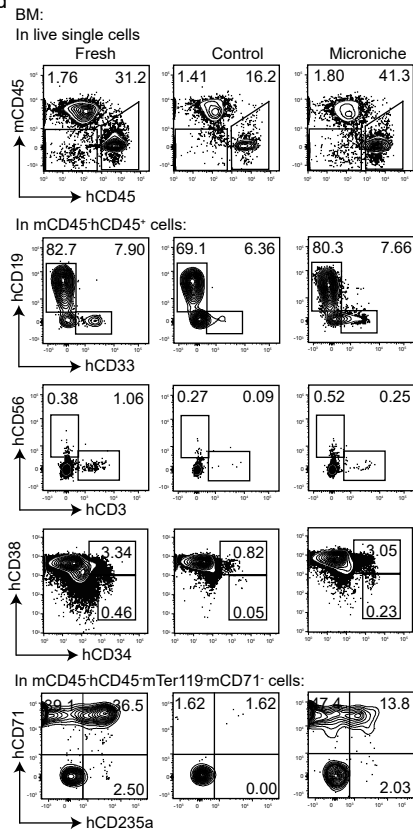

f

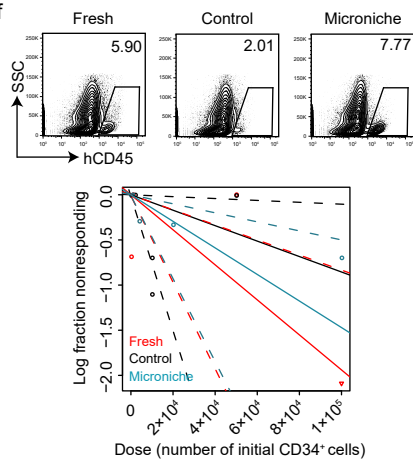



**Supplementary Figure 2. Ex vivo culture data with Microniche.** **a** Schematic representation of the LDA experiment design. NOG mice were transplanted with different day 0 equivalent cell doses of fresh (fresh) UCB CD34<sup>+</sup> cells or their progeny cultured with or without Microniche for 7 days. **b** Limit dilution analysis of NOG engraftment at 16 weeks post-transplantation. The table summarizing primary and secondary engraftment and stem cell frequency. If an obvious positive cell cluster was observed, the mice were considered to be successfully engrafted regardless of the portion of hCD45<sup>+</sup>. Stem cell frequency analyzed by Chi-square test. **c** Representative FACS profiles of the engrafting human CD45<sup>+</sup> cells in DAPI<sup>-</sup> cells, human myeloid (hCD33<sup>+</sup>) and B-lymphoid (hCD19<sup>+</sup>) cells in hCD45<sup>+</sup> cells, human megakaryocytes (hCD41a<sup>+</sup>) in hCD45<sup>-</sup> cells in PB of primary NOG mice 16 weeks post-transplantation. **d** Representative FACS profiles of the engrafting human CD45<sup>+</sup> cells and multilineage reconstitution in BM of primary NOG mice 16 weeks post-transplantation. Human myeloid (hCD33<sup>+</sup>), B-lymphoid (hCD19<sup>+</sup>), T-lymphoid (hCD3<sup>+</sup>), natural killer cells (NK, hCD56<sup>+</sup>), hematopoietic stem (hCD34<sup>+</sup>CD38<sup>-</sup>) and progenitor (hCD34<sup>+</sup>CD38<sup>+</sup>) cells in mCD45<sup>-</sup>hCD45<sup>+</sup> cells and erythroid lineage (hCD71<sup>+</sup>CD235a<sup>-</sup>, hCD71<sup>+</sup>CD235a<sup>+</sup>, hCD71<sup>-</sup>CD235a<sup>+</sup>) in mCD45<sup>-</sup>hCD45<sup>+</sup>mTer119<sup>-</sup>mCD71<sup>-</sup> cells are shown. **e** Relative distribution of myeloid, B-lymphoid, T-lymphoid and NK cells as a percentage of hCD45<sup>+</sup> cells in BM of primary engrafted NOG mice. Fresh  $n = 15$ , Control  $n = 5$ , Microniche  $n = 16$  biologically independent animals. Data are means  $\pm$  s.d. and no significant difference between groups. **f** Representative FACS profiles of the engrafting human CD45<sup>+</sup> cells and graph of limit dilution analysis of secondary engraftment. Chi-square test. Solid lines indicate best-fit linear model and dashed lines confidence intervals.

Figure S3

a

In mouse BM LKS<sup>+</sup> cells:

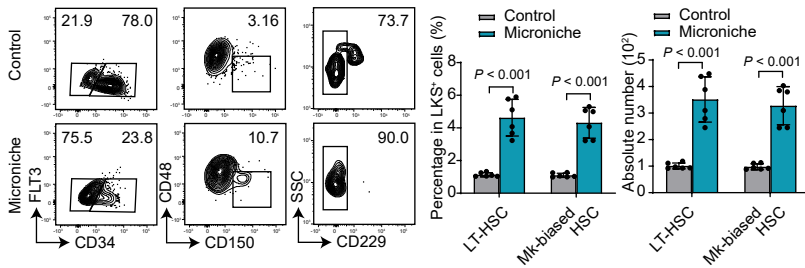

b

Mk colony formation of mouse HSPCs

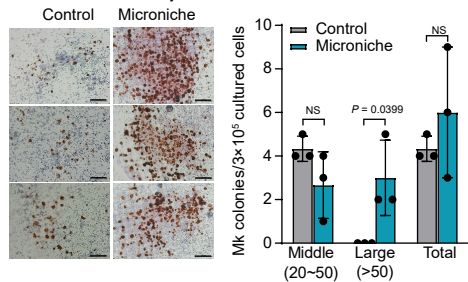

c

Mk colony formation of human HSPCs

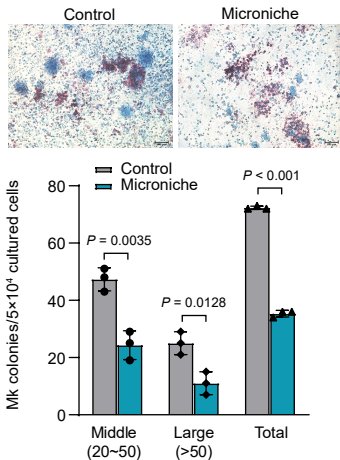

d

Gating strategy of long-term culture

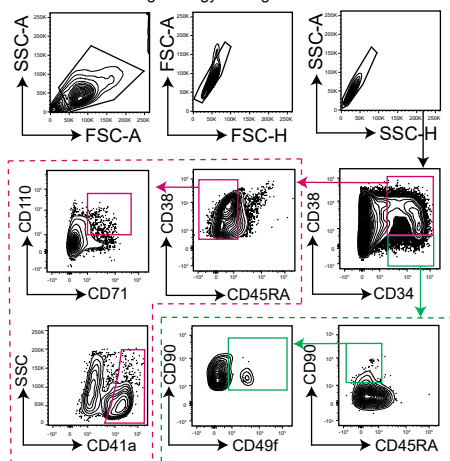

e

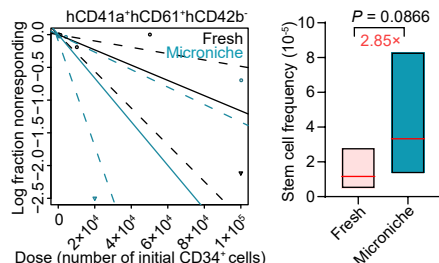

f

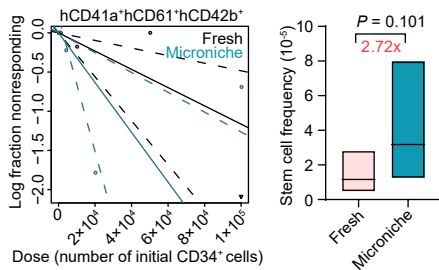

**Supplementary Figure 3. Effect of Microniche on Mk lineage.** **a** Representative FACS profiles of LKS<sup>+</sup>CD34<sup>-</sup>CD150<sup>+</sup>CD48<sup>-</sup> (LT-HSC) and LKS<sup>+</sup>CD34<sup>-</sup>CD150<sup>+</sup>CD48<sup>-</sup>CD229<sup>-</sup> (Mk-biased HSC) in cultured (day 7) mice c-Kit<sup>+</sup> cells. The percentage and the absolute number of LT-HSC and Mk-biased HSC are shown ( $n = 6$  biological replicates). All data represent means  $\pm$  s.d.; unpaired two-tailed Student's  $t$ -test. **b** Formation of mouse megakaryocytic colonies (CFU-Mk) in a collagen-based culture system ( $n = 3$  biological replicates). All data represent means  $\pm$  s.d.; unpaired two-tailed Student's  $t$ -test. Representative morphology images are also shown. Scale bars, 100  $\mu$ m. Colony size: middle (20 to 50 cells), or large (>50 cells). **c** Human CFU-Mk ( $n = 3$  biological replicates). All data represent means  $\pm$  s.d.; unpaired two-tailed Student's  $t$ -test. Representative morphology images are also shown. Scale bars, 100  $\mu$ m. **d** Flow cytometry gating strategies for HSC and Mk subpopulations during long-term culture *in vitro*. **e-f** Graphs and boxplots of Mk-HSC frequencies based on phenotype-defined subpopulations mCD45<sup>+</sup>hCD45<sup>-</sup>mCD41<sup>-</sup>mCD42d<sup>-</sup>mCD61<sup>+</sup>hCD41a<sup>+</sup>hCD61<sup>+</sup>hCD42b<sup>-</sup> (**e**) and CD45<sup>+</sup>hCD45<sup>-</sup>mCD41<sup>-</sup>mCD42d<sup>-</sup>mCD61<sup>+</sup>hCD41a<sup>+</sup>hCD61<sup>+</sup>hCD42b<sup>+</sup> (**f**) 16 weeks after transplantation. Fresh  $n = 43$ , Control  $n = 30$ , Microniche  $n = 36$  biologically independent animals. Chi-square test. Solid lines indicate best-fit linear model and dashed lines confidence intervals. Box plots show the median (middle line) with the 25th and 75th percentiles (box).

Figure S4

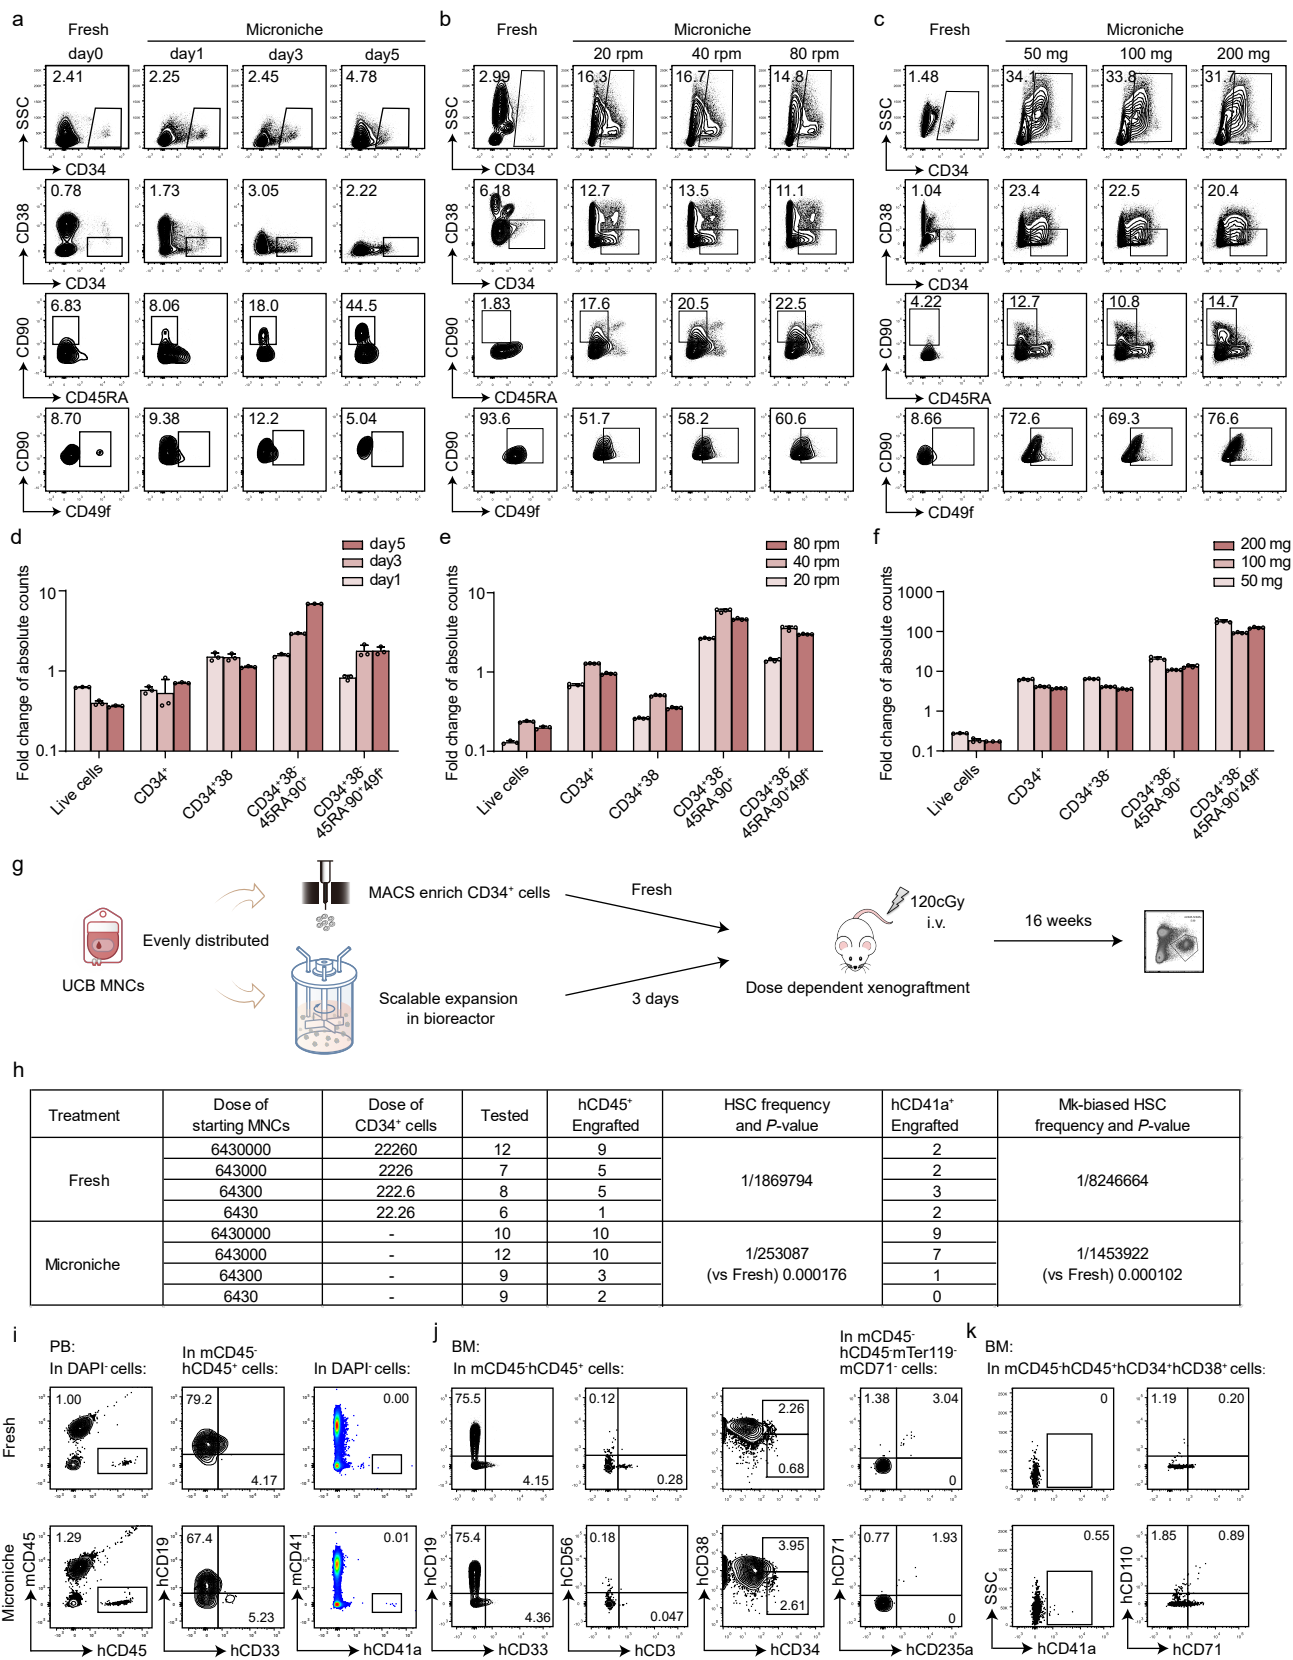

**Supplementary Figure 4. Large-scale dynamic culture condition screening.** **a-c** Representative FACS profiles of CD34<sup>+</sup>, CD34<sup>+</sup>CD38<sup>-</sup>, CD34<sup>+</sup>CD38<sup>-</sup>CD45RA<sup>-</sup>CD90<sup>+</sup>, and CD34<sup>+</sup>CD38<sup>-</sup>CD45RA<sup>-</sup>CD90<sup>+</sup>CD49f<sup>+</sup> populations in UCB MNCs before (fresh = day 0, *n* = 3 technical replicates) and after cultured with the Microniche for different days (*n* = 3 biological replicates) (**a**), reactor speeds (*n* = 4 biological replicates) (**b**) and Microniche doses (*n* = 4 biological replicates) (**c**) in a dynamic stirred bioreactor. **d-f** Statistics of fold changes in absolute counts of the indicated cell populations at different time points (**d**), reactor speeds (**e**) and Microniche doses (**f**) compared to fresh. Fresh, *n* = 3 technical replicates; Microniche, *n* = 3 or 4 biological replicates. All data represent means ± s.d. **g** Schematic representation of the LDA experiment design of bulk-culture. **h** Limit dilution analysis of NCG engraftment at 16 weeks post-transplantation. The table summarizing hCD45<sup>+</sup> and hCD41a<sup>+</sup> engraftment, and stem cell frequency. If no less than 0.01% mCD45<sup>-</sup>hCD45<sup>+</sup> cells or no less than 0.01% hCD41a<sup>+</sup> cells in mCD45<sup>-</sup>hCD45<sup>+</sup>mCD41<sup>-</sup>mCD42d<sup>-</sup>mCD62<sup>-</sup> population were observed, the mice were considered to be successfully engrafted or Mk reconstructed. HSC and Mk-biased HSC frequencies analyzed by Chi-square test. **i** Representative FACS profiles of the engrafting human CD45<sup>+</sup> cells in DAPI<sup>-</sup>mCD45<sup>-</sup> cells, human myeloid (hCD33<sup>+</sup>) and B-lymphoid (hCD19<sup>+</sup>) cells in mCD45<sup>-</sup>hCD45<sup>+</sup> cells, human megakaryocytes (hCD41a<sup>+</sup>) in DAPI<sup>-</sup>mCD41<sup>-</sup> cells in PB of primary NOG mice 8 weeks post-transplantation. **j** Representative FACS profiles of the multilineage reconstitution in BM of NCG mice 16 weeks post-transplantation. Human myeloid (hCD33<sup>+</sup>), B-lymphoid (hCD19<sup>+</sup>), T-lymphoid (hCD3<sup>+</sup>), natural killer cells (NK, hCD56<sup>+</sup>), hematopoietic stem (hCD34<sup>+</sup>CD38<sup>-</sup>) and progenitor (hCD34<sup>+</sup>CD38<sup>+</sup>) cells in mCD45<sup>-</sup>hCD45<sup>+</sup> cells and erythroid lineage (hCD71<sup>+</sup>CD235a<sup>-</sup>, hCD71<sup>+</sup>CD235a<sup>+</sup>, hCD71<sup>-</sup>CD235a<sup>+</sup>) in mCD45<sup>-</sup>hCD45<sup>-</sup>mTer119<sup>-</sup>mCD71<sup>-</sup> cells are shown. **k** Representative FACS profiles of Mk reconstruction in BM mCD45<sup>-</sup>hCD45<sup>-</sup>hCD34<sup>+</sup>hCD38<sup>+</sup> cells of NCG mice at 16 weeks post-transplantation.

Figure S5

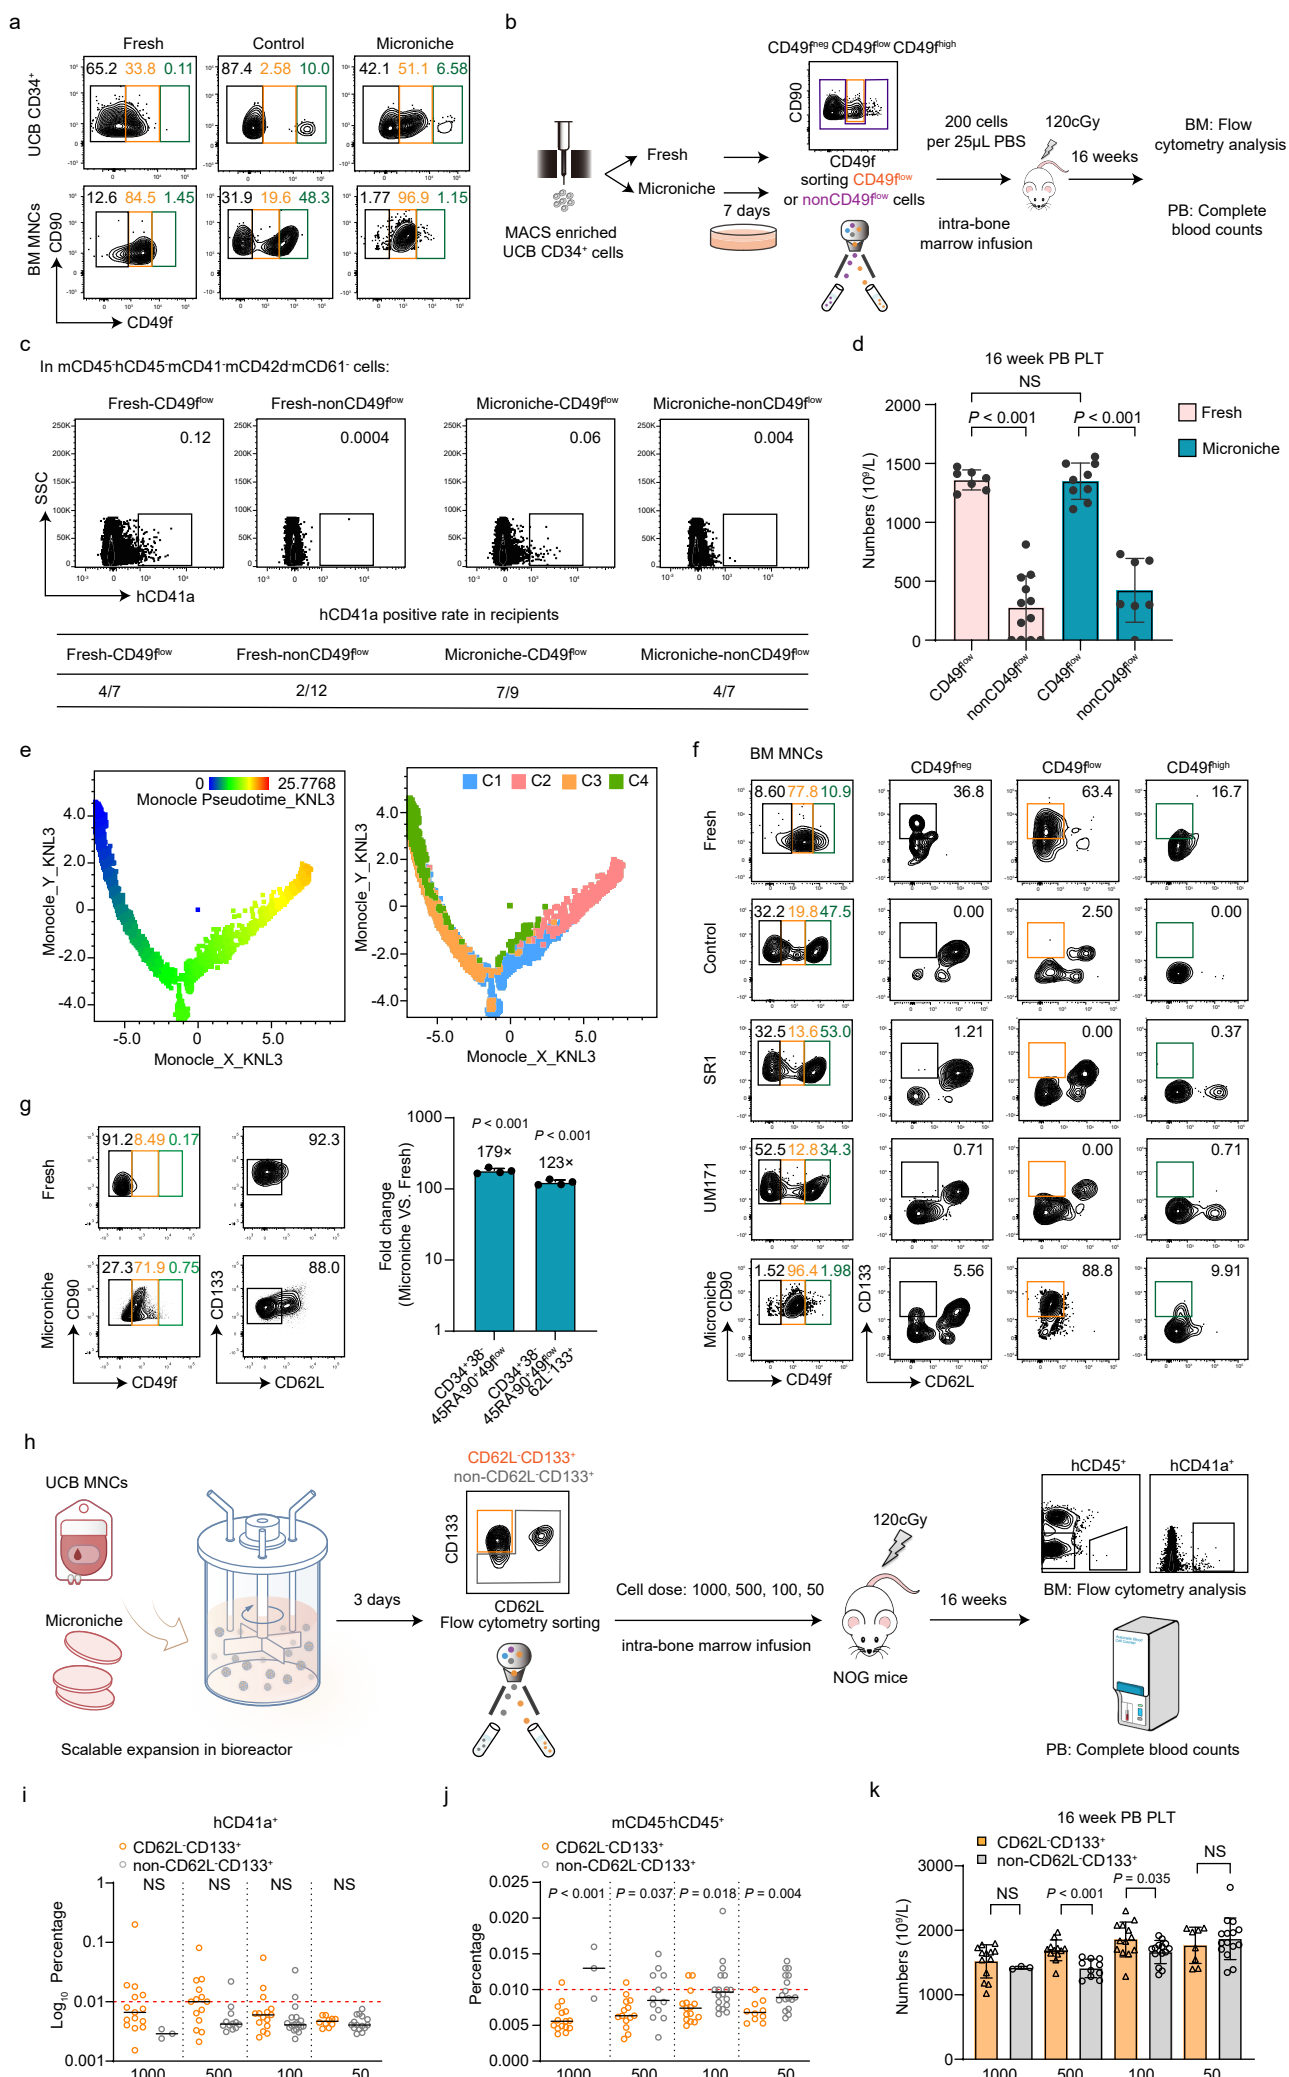

**Supplementary Figure 5. Special subpopulation maintained by Microniche.** **a** Representative FACS profiles showing CD49f distribution in UCB CD34<sup>+</sup> cells and BM MNCs before (fresh) and after culture in Microniche or control generated by gating CD34<sup>+</sup>CD38<sup>-</sup>CD45RA<sup>-</sup>CD90<sup>+</sup> cells. **b** Experimental diagram of xenograft using CD49f<sup>low</sup> and nonCD49f<sup>low</sup> cells from CD34<sup>+</sup>CD38<sup>-</sup>CD45RA<sup>-</sup>CD90<sup>+</sup>. **c** Upper panel: Representative FACS profiles of Mk reconstitution in BM mCD45<sup>-</sup>hCD45<sup>-</sup>mCD41<sup>-</sup>mCD42d<sup>-</sup>mCD61<sup>-</sup> cells of NOG mice 16 weeks post-transplantation with sorted CD49f<sup>low</sup> (CD34<sup>+</sup>CD38<sup>-</sup>CD45RA<sup>-</sup>CD90<sup>+</sup>CD49f<sup>low</sup>) or nonCD49f<sup>low</sup> (CD34<sup>+</sup>CD38<sup>-</sup>CD45RA<sup>-</sup>CD90<sup>+</sup>CD49f<sup>neg&high</sup>) cells. Lower panel: The proportion of successful reconstitution of Mk lineage based on hCD41a expression in BM mCD45<sup>-</sup>hCD45<sup>-</sup>mCD41<sup>-</sup>mCD42d<sup>-</sup>mCD61<sup>-</sup> cells of NOG mice. **d** Platelet (PLT) counts in PB of recipients at week 16 post-transplantation. Fresh-CD49f<sup>low</sup> *n* = 7, Fresh-nonCD49f<sup>low</sup> *n* = 12, Microniche-CD49f<sup>low</sup> *n* = 9, Microniche-nonCD49f<sup>low</sup> *n* = 7 biologically independent animals. All data represent the means ± s.d.; unpaired two-tailed Students' *t*-test. **e** Pseudotime analysis by Monocle 2 (left). Trajectory analysis combining four cell clusters indicates the developmental path from C2 to C4 (right). **f** Representative FACS profiles of CD62L<sup>-</sup>CD133<sup>+</sup> distribution within CD34<sup>+</sup>CD38<sup>-</sup>CD45RA<sup>-</sup>CD90<sup>+</sup>CD49f<sup>neg/low/high</sup> subpopulations of BM MNCs before (fresh) and after 7 days of culture in control or control medium supplemented with SR1 (1μM), UM171 (40nM) or Microniche. **g** Representative FACS profiles and fold change of absolute counts of UCB MNC CD34<sup>+</sup>CD38<sup>-</sup>CD45RA<sup>-</sup>CD90<sup>+</sup>CD49f<sup>low</sup> and CD34<sup>+</sup>CD38<sup>-</sup>CD45RA<sup>-</sup>CD90<sup>+</sup>CD49f<sup>low</sup>CD62L<sup>-</sup>CD133<sup>+</sup> subpopulations before (fresh) and after 3 days of expansion in a Microniche-based bioreactor. Fresh, *n* = 4 technical replicates; Microniche, *n* = 4 biological replicates. All data represent means ± s.d.; unpaired two-tailed Students' *t*-test. **h** Experimental diagram of xenograft using sorted CD62L<sup>-</sup>CD133<sup>+</sup> and non-CD62L<sup>-</sup>CD133<sup>+</sup> (in CD34<sup>+</sup>CD38<sup>-</sup>CD45RA<sup>-</sup>CD90<sup>+</sup>CD49f<sup>low</sup>) populations derived from cultured UCB MNCs in a Microniche-based bioreactor. CD62L<sup>-</sup>CD133<sup>+</sup> 1000, 500, 100, 50 group *n* = 15, 14, 15, 10; non-CD62L<sup>-</sup>CD133<sup>+</sup> 1000, 500, 100, 50 group *n* = 3, 12, 18, 17 biologically independent animals. **i** Log percentage level of hCD41a<sup>+</sup> cells in mCD45<sup>-</sup>hCD45<sup>-</sup>mCD41<sup>-</sup>mCD42d<sup>-</sup>mCD61<sup>-</sup> population of recipient BM cells. **j** Percentage level of mCD45<sup>-</sup>hCD45<sup>+</sup> cells in recipient BM cells. **k** Platelet (PLT) counts in PB of recipients at week 16 post-transplantation under different doses of transplanted cells. All data represent the means ± s.d.; unpaired two-tailed Students' *t*-test. NS, not significant.

Figure S6

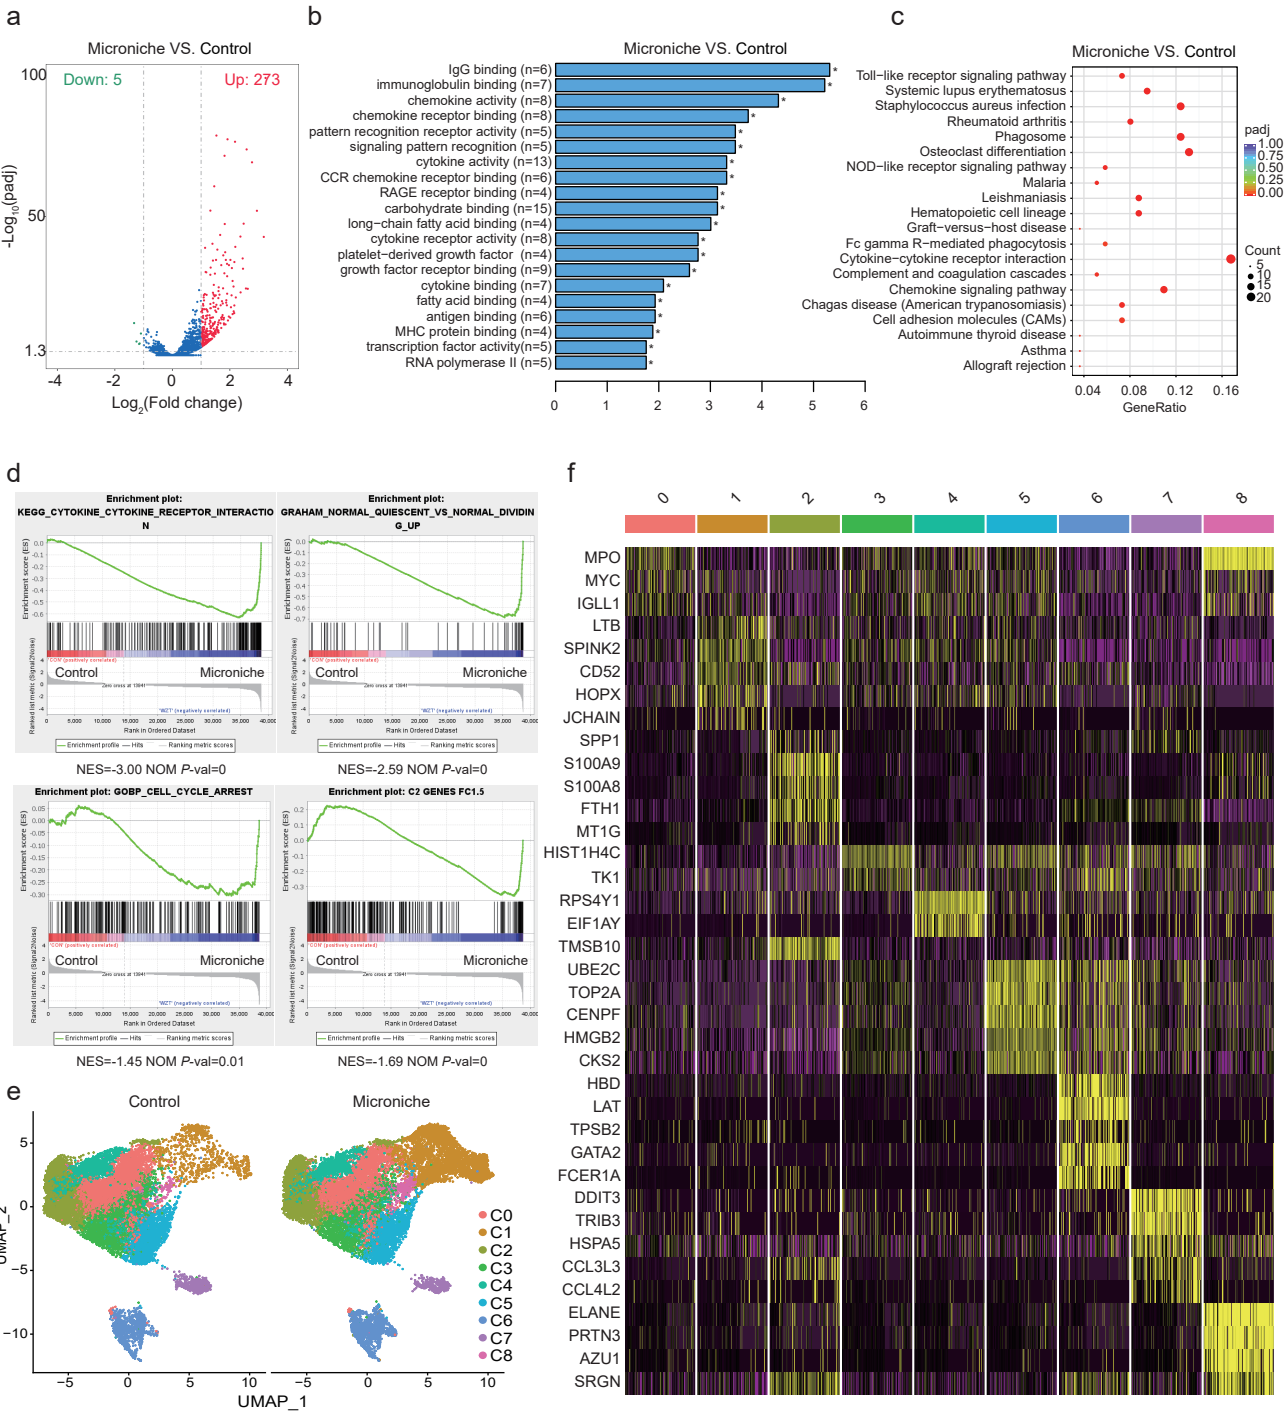



**Supplementary Figure 6. Data of RNA sequencing and 10X Genomic single-cell RNA sequencing. a-d,** RNA-seq profiling of Microniche cultured UCB CD34<sup>+</sup> cells. **a** Volcano plot of differentially expressed genes (DEGs) between Microniche and Control groups. Red, 273 upregulated DEGs; Green, 5 downregulated DEGs. DEGs with the adjusted p-value (padj) <0.05 and |Log<sub>2</sub>(FoldChange)| >1. **b** The major GO:MF terms showing enriched expression with padj <0.05 in Microniche-cultured CD34<sup>+</sup> cells as indicated in Fig. 5a. **c** KEGG pathways enrichment analysis with padj <0.05. Colors represent padj and bubble size encodes the count of DEGs annotated to the KEGG pathway. GeneRatio represents the proportion of proteins (gene products) in the correspondent abundance groups that is found in each category. **d** GSEA enrichment plots of the gene sets enriched in Microniche versus control, as indicated in Fig. 5b. Genes were ranked using Signal-to-Noise ratio statistics according to their correlation. Vertical black lines mark the position of each gene in the data set. Normalized Enrichment Score (NES) and Nominal *P*-value (NOM *P*-val) are shown. **e** Identification of nine cell clusters in control and Microniche cultures visualized by UMAP in 10X genomics single cell RNA-seq profile of CD34<sup>+</sup> cells sorted after culture. Each dot represents one cell, and colours represent distinct cell clusters (C0-C8). **f** Heatmap showing distinct cell clusters (identified by UMAP) annotated by the expression of feature genes in 10X Genomic single-cell RNA sequencing. Relative to Fig. 5e.

Figure S7

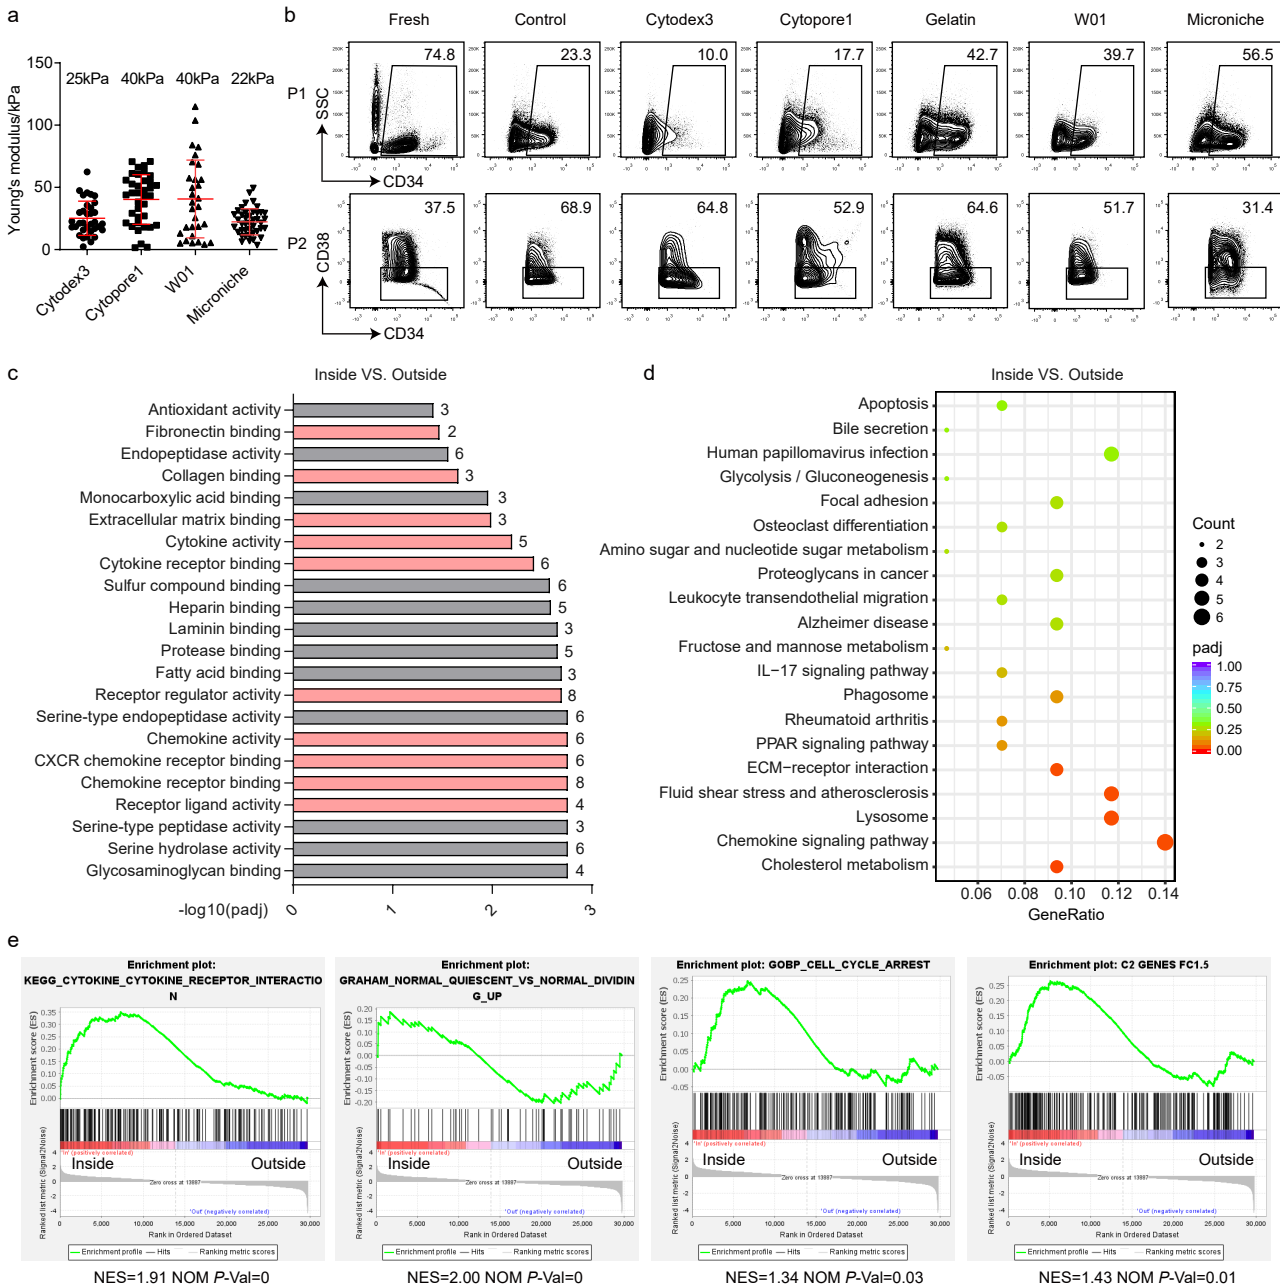

**Supplementary Figure 7. Data of FACS profiles and RNA sequencing of cultured cells inside and outside Microniche.** **a** The elasticity of different microcarriers based on the Young's modulus data. **b** Representative FACS profiles of CD34<sup>+</sup> (P1) and CD34<sup>+</sup>CD38 (P2) populations in UCB CD34<sup>+</sup> cells before (fresh) and after culturing in control medium or control medium supplemented with Cytodex3, Cytopore1, Gelatin, Microcarrier W01, or Microniche. Fresh,  $n = 3$  technical replicates; other groups,  $n = 3$  biological replicates. **c** The major GO:MF terms showing enriched expression with  $\text{padj} < 0.05$  in cultured cells inside Microniche as indicated in Figure 6g. **d** KEGG pathways enrichment analysis with  $\text{padj} < 0.05$ . Colours represent  $\text{padj}$  and bubble size represents the count of DEGs annotated to the KEGG pathway. GeneRatio represents the proportion of proteins (gene products) in the correspondent abundance groups that is found in each category. **e** GSEA enrichment plots of the gene sets enriched in cultured cells inside versus outside the Microniche, as indicated in Fig. 6h. Genes were ranked using Signal-to-Noise ratio statistics according to their correlation. Vertical black lines mark the position of each gene in the data set. Normalized Enrichment Score (NES) and Nominal  $P$ -value (NOM  $P$ -val) are shown.

Figure S8

a

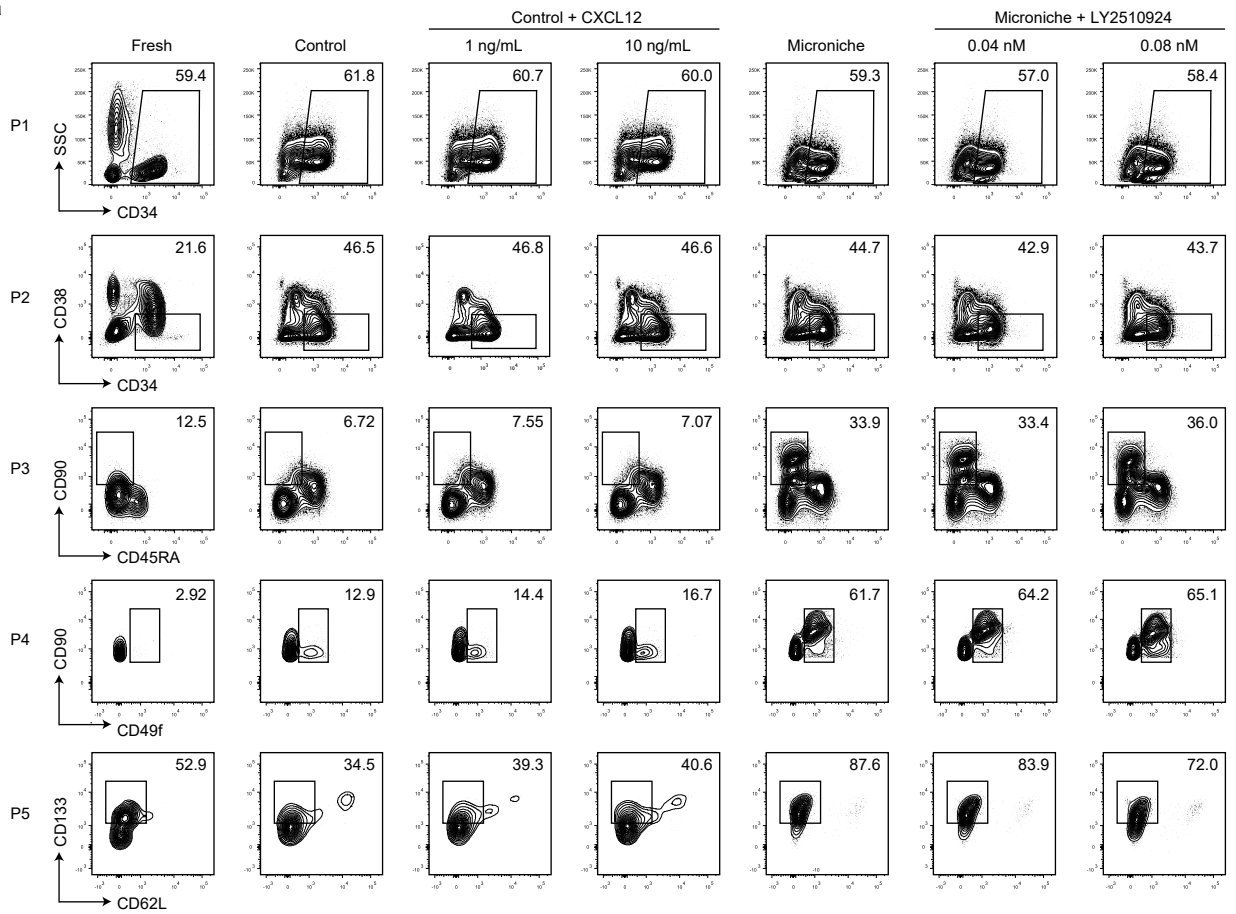

b

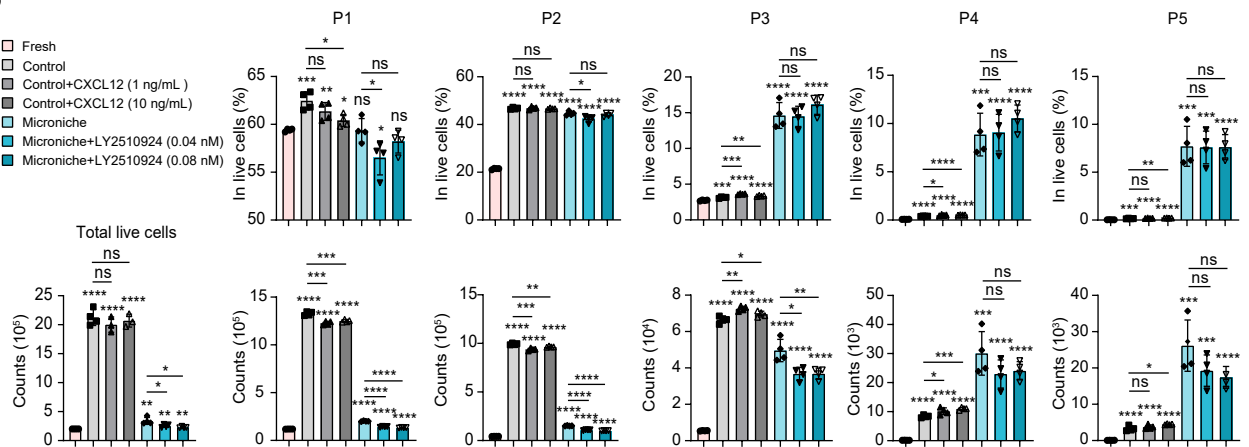

**Supplementary Figure 8. The role of CXCR4 in expansion of HSCs by Microniche.** **a** Representative FACS profiles of CD34<sup>+</sup> (P1), CD34<sup>+</sup>CD38<sup>-</sup> (P2), CD34<sup>+</sup>CD38<sup>-</sup>CD45RA<sup>-</sup>CD90<sup>+</sup> (P3), CD34<sup>+</sup>CD38<sup>-</sup>CD45RA<sup>-</sup>CD90<sup>+</sup>CD49<sup>low</sup> (P4), and CD34<sup>+</sup>CD38<sup>-</sup>CD45RA<sup>-</sup>CD90<sup>+</sup>CD49<sup>low</sup>CD62L<sup>-</sup>CD133<sup>+</sup> (P5) populations in UCB CD34<sup>+</sup> cells before (fresh) and after culture in control, control medium supplemented with 1 ng/mL or 10 ng/mL human CXCL12 protein, Microniche. or Microniche supplemented with 0.04 nM or 0.08 nM LY2510924. **b** Percentages and absolute counts of live cells, P1, P2, P3, P4, and P5 populations before (fresh) and after 7 days *in vitro* culture assay of (a). Fresh, *n* = 4 technical replicates; other groups, *n* = 4 biological replicates. All data represent the means ± s.d.; unpaired two-tailed Students' *t*-test. Comparisons with control unless otherwise indicated; \**P* < 0.05; \*\**P* < 0.01; \*\*\**P* < 0.001; \*\*\*\**P* < 0.0001; ns = not significant.

**Supplementary Table 1. Information on AA patient specimens.** Proportion and absolute counts of total, CD34<sup>+</sup>CD38<sup>-</sup>, and CD34<sup>+</sup>CD38<sup>-</sup>CD49f<sup>+</sup> cells derived from AA patient BM MNCs after 7 days in culture are shown ( $n = 1$  for AA1-5). # denotes absolute counts, % denotes percentage in live cells. For AA6 and AA8,  $n = 3$  mice; For AA7,  $n = 6$  (control) and 4 (Microniche) mice.

| Specimen No. | Disease severity at diagnosis | Total cells         |                     | CD34 <sup>+</sup> CD38 <sup>-</sup> |                     |            |                     | CD34 <sup>+</sup> CD38 <sup>-</sup> CD49f <sup>+</sup> |                     |            |                     | Assay                   | Additional info.                                                                                |
|--------------|-------------------------------|---------------------|---------------------|-------------------------------------|---------------------|------------|---------------------|--------------------------------------------------------|---------------------|------------|---------------------|-------------------------|-------------------------------------------------------------------------------------------------|
|              |                               | Control             | Microniche          | Control                             |                     | Microniche |                     | Control                                                |                     | Microniche |                     |                         |                                                                                                 |
|              |                               | # ( $\times 10^5$ ) | # ( $\times 10^5$ ) | %                                   | # ( $\times 10^3$ ) | %          | # ( $\times 10^3$ ) | %                                                      | # ( $\times 10^3$ ) | %          | # ( $\times 10^3$ ) |                         |                                                                                                 |
| AA1          | AA                            | 1.72                | 1.56                | 0.16                                | 0.27                | 0.82       | 1.28                | 0.12                                                   | 0.20                | 0.66       | 1.03                | <i>in vitro</i> culture | 1 $\times 10^5$ MNCs/well, 14 days <i>in vitro</i> culture                                      |
| AA2          | AA                            | 0.70                | 0.92                | 1.02                                | 0.71                | 1.50       | 1.38                | 0.40                                                   | 0.28                | 1.47       | 1.36                |                         |                                                                                                 |
| AA3          | AA                            | 0.90                | 1.01                | 0.23                                | 0.21                | 3.36       | 3.39                | 0.11                                                   | 0.10                | 3.26       | 3.30                |                         |                                                                                                 |
| AA4          | NSAA                          | 1.10                | 1.30                | 0.11                                | 0.12                | 0.39       | 0.51                | -                                                      | -                   | -          | -                   |                         |                                                                                                 |
| AA5          | NSAA                          | 1.50                | 1.40                | 0.14                                | 0.21                | 0.74       | 1.04                | -                                                      | -                   | -          | -                   |                         |                                                                                                 |
| AA6          | AA                            | -                   |                     |                                     |                     |            |                     |                                                        |                     |            |                     | NOG transplantation     | 2 $\times 10^5$ MNCs/well, 12 days <i>in vitro</i> culture; i.v. 2 $\times 10^5$ cultured cells |
| AA7          | AA                            | -                   |                     |                                     |                     |            |                     |                                                        |                     |            |                     |                         | 2 $\times 10^5$ MNCs/well, 12 days <i>in vitro</i> culture; intra-BM injection                  |
| AA8          | AA                            | -                   |                     |                                     |                     |            |                     |                                                        |                     |            |                     |                         | 5 $\times 10^4$ cultured cells                                                                  |

**Supplementary Table 2. Proportion and absolute counts of mice c-Kit<sup>+</sup> cells after culture *in vitro*.** Values represent mean  $\pm$  s.d. ( $n = 6$  biological replicates), % denotes percentage in live cells unless otherwise specified, # denotes absolute counts. Comparisons with control, \* $p < 0.05$ , \*\*\*\* $p < 0.0001$  by unpaired two-tailed Student's *t*-test.

| Subpopulations                                                                             | Treatment                   |                                     |                             |                                     |
|--------------------------------------------------------------------------------------------|-----------------------------|-------------------------------------|-----------------------------|-------------------------------------|
|                                                                                            | Control                     |                                     | Microniche                  |                                     |
|                                                                                            | %                           | # ( $\times 10^4$ )                 | %                           | # ( $\times 10^4$ )                 |
| live cells                                                                                 |                             | 118 $\pm$ 21                        |                             | 112 $\pm$ 18                        |
| Lin <sup>-</sup>                                                                           | 12.90 $\pm$ 2.81            | 15.26 $\pm$ 3.33                    | 9.70 $\pm$ 1.23*            | 10.84 $\pm$ 1.37*                   |
| Lin <sup>-</sup> c-Kit <sup>+</sup> Sca-1 <sup>-</sup>                                     | 1.14 $\pm$ 0.04             | 1.35 $\pm$ 0.04                     | 1.18 $\pm$ 0.23             | 1.31 $\pm$ 0.26                     |
| Lin <sup>-</sup> c-Kit <sup>+</sup> Sca-1 <sup>+</sup>                                     | 0.75 $\pm$ 0.04             | 0.89 $\pm$ 0.05                     | 0.68 $\pm$ 0.08             | 0.76 $\pm$ 0.09                     |
| LKS <sup>+</sup> CD34 <sup>+</sup> FIt3 <sup>-</sup>                                       | 0.56 $\pm$ 0.04             | 0.66 $\pm$ 0.04                     | 0.16 $\pm$ 0.04****         | 0.18 $\pm$ 0.05****                 |
| LKS <sup>+</sup> CD34 <sup>-</sup> FIt3 <sup>-</sup>                                       | 0.19 $\pm$ 0.03             | 0.22 $\pm$ 0.04                     | 0.50 $\pm$ 0.07****         | 0.56 $\pm$ 0.08****                 |
|                                                                                            | <b>% in LKS<sup>+</sup></b> | <b># (<math>\times 10^2</math>)</b> | <b>% in LKS<sup>+</sup></b> | <b># (<math>\times 10^2</math>)</b> |
| LKS <sup>+</sup> CD34 <sup>-</sup> CD150 <sup>+</sup> CD48 <sup>-</sup>                    | 1.13 $\pm$ 0.13             | 1.01 $\pm$ 0.11                     | 4.63 $\pm$ 1.12****         | 3.52 $\pm$ 0.85****                 |
| LKS <sup>+</sup> CD34 <sup>-</sup> CD150 <sup>+</sup> CD48 <sup>-</sup> CD229 <sup>-</sup> | 1.10 $\pm$ 0.13             | 0.98 $\pm$ 0.11                     | 4.31 $\pm$ 0.94****         | 3.28 $\pm$ 0.72****                 |

**Supplementary Table 3. Proportion and absolute counts of phenotypically defined cell subsets before and after culture in a bioreactor in different conditions.** Values represent mean  $\pm$  s.d. (Fresh,  $n = 3$  technical replicates; Microniche,  $n = 3$  or 4 biological replicates), % denotes percentage in live cells, # denotes absolute counts, FC denotes fold change in absolute counts after culture. Comparisons with fresh, \* $p < 0.05$ , \*\* $p < 0.01$ , \*\*\* $p < 0.001$ , \*\*\*\* $p < 0.0001$  by unpaired two-tailed Student's  $t$ -test.

| Treatment \ Subpopulations |        | live cells              |      | CD34 <sup>+</sup>        |                         |      | CD34 <sup>+</sup> CD38 <sup>-</sup> |                         |      | CD34 <sup>+</sup> CD38 <sup>-</sup> CD45RA <sup>-</sup> CD90 <sup>+</sup> |                      |       | CD34 <sup>+</sup> CD38 <sup>-</sup> CD45RA <sup>-</sup> CD90 <sup>+</sup> CD49f <sup>+</sup> |                          |        |
|----------------------------|--------|-------------------------|------|--------------------------|-------------------------|------|-------------------------------------|-------------------------|------|---------------------------------------------------------------------------|----------------------|-------|----------------------------------------------------------------------------------------------|--------------------------|--------|
|                            |        | # ( $\times 10^8$ )     | FC   | %                        | # ( $\times 10^6$ )     | FC   | %                                   | # ( $\times 10^6$ )     | FC   | %                                                                         | # ( $\times 10^5$ )  | FC    | %                                                                                            | # ( $\times 10^4$ )      | FC     |
| Fresh                      | day0   | 1.50 $\pm$ 0.00         |      | 2.47 $\pm$ 0.15          | 3.70 $\pm$ 0.23         |      | 0.74 $\pm$ 0.06                     | 1.11 $\pm$ 0.09         |      | 0.06 $\pm$ 0.02                                                           | 0.92 $\pm$ 0.29      |       | 0.01 $\pm$ 0.01                                                                              | 1.60 $\pm$ 0.76          |        |
| Microniche                 | day1   | 0.94 $\pm$ 0.01<br>**** | 0.63 | 2.28 $\pm$ 0.23          | 2.14 $\pm$ 0.22 **      | 0.58 | 1.77 $\pm$ 0.20 **                  | 1.66 $\pm$ 0.19 **      | 1.51 | 0.15 $\pm$ 0.01 **                                                        | 1.45 $\pm$ 0.06 *    | 1.57  | 0.01 $\pm$ 0.00                                                                              | 1.32 $\pm$ 0.09          | 0.82   |
|                            | day3   | 0.60 $\pm$ 0.04<br>**** | 0.40 | 3.28 $\pm$ 1.58          | 1.96 $\pm$ 0.94 *       | 0.53 | 2.74 $\pm$ 0.28 ***                 | 1.64 $\pm$ 0.17 **      | 1.48 | 0.45 $\pm$ 0.01<br>****                                                   | 2.71 $\pm$ 0.03 ***  | 2.93  | 0.05 $\pm$ 0.01 **                                                                           | 2.85 $\pm$ 0.50          | 1.78   |
|                            | day5   | 0.55 $\pm$ 0.01<br>**** | 0.36 | 4.82 $\pm$ 0.018<br>**** | 2.63 $\pm$ 0.04 **      | 0.71 | 2.27 $\pm$ 0.06 ****                | 1.24 $\pm$ 0.03         | 1.12 | 1.17 $\pm$ 0.00<br>****                                                   | 6.37 $\pm$ 0.02 **** | 6.89  | 0.05 $\pm$ 0.01 ***                                                                          | 2.86 $\pm$ 0.32          | 1.79   |
| Fresh                      |        | 0.66 $\pm$ 0.00         |      | 3.09 $\pm$ 0.09          | 2.04 $\pm$ 0.06         |      | 6.27 $\pm$ 0.13                     | 4.14 $\pm$ 0.08         |      | 0.11 $\pm$ 0.02                                                           | 0.72 $\pm$ 0.12      |       | 0.10 $\pm$ 0.02                                                                              | 6.87 $\pm$ 1.30          |        |
| Microniche                 | 20 rpm | 0.09 $\pm$ 0.00<br>**** | 0.13 | 16.33 $\pm$ 0.67<br>**** | 1.40 $\pm$ 0.06<br>**** | 0.68 | 12.63 $\pm$ 0.22<br>****            | 1.08 $\pm$ 0.02<br>**** | 0.26 | 2.23 $\pm$ 0.04<br>****                                                   | 1.91 $\pm$ 0.03 **** | 2.66  | 1.13 $\pm$ 0.05<br>****                                                                      | 9.67 $\pm$ 0.40 **       | 1.41   |
|                            | 40 rpm | 0.16 $\pm$ 0.00<br>**** | 0.24 | 16.78 $\pm$ 0.10<br>**** | 2.62 $\pm$ 0.01<br>**** | 1.28 | 13.43 $\pm$ 0.30<br>****            | 2.09 $\pm$ 0.05<br>**** | 0.51 | 2.73 $\pm$ 0.12<br>****                                                   | 4.26 $\pm$ 0.18 **** | 5.96  | 1.58 $\pm$ 0.08<br>****                                                                      | 24.60 $\pm$ 1.21<br>**** | 3.58   |
|                            | 80 rpm | 0.13 $\pm$ 0.01<br>**** | 0.20 | 14.80 $\pm$ 0.33<br>**** | 1.94 $\pm$ 0.04 *       | 0.95 | 11.10 $\pm$ 0.29<br>****            | 1.45 $\pm$ 0.04<br>**** | 0.35 | 2.53 $\pm$ 0.06<br>****                                                   | 3.32 $\pm$ 0.08 **** | 4.64  | 1.57 $\pm$ 0.02<br>****                                                                      | 20.50 $\pm$ 0.25<br>**** | 2.99   |
| Fresh                      |        | 1.00 $\pm$ 0.00         |      | 1.47 $\pm$ 0.08          | 1.47 $\pm$ 0.08         |      | 1.02 $\pm$ 0.06                     | 1.02 $\pm$ 0.06         |      | 0.04 $\pm$ 0.00                                                           | 0.42 $\pm$ 0.03      |       | 0.003 $\pm$ 0.00                                                                             | 0.35 $\pm$ 0.07          |        |
| Microniche                 | 50 mg  | 0.28 $\pm$ 0.00<br>**** | 0.28 | 32.95 $\pm$ 1.29<br>**** | 9.14 $\pm$ 0.36<br>**** | 6.24 | 23.80 $\pm$ 0.42<br>****            | 6.60 $\pm$ 0.12<br>**** | 6.47 | 3.15 $\pm$ 0.29<br>****                                                   | 8.74 $\pm$ 0.80 **** | 20.77 | 2.26 $\pm$ 0.20<br>****                                                                      | 62.75 $\pm$ 5.59<br>**** | 179.29 |
|                            | 100 mg | 0.18 $\pm$ 0.02<br>**** | 0.18 | 32.80 $\pm$ 0.78<br>**** | 6.04 $\pm$ 0.14<br>**** | 4.12 | 22.70 $\pm$ 0.44<br>****            | 4.18 $\pm$ 0.08<br>**** | 4.10 | 2.47 $\pm$ 0.06<br>****                                                   | 4.54 $\pm$ 0.11 **** | 10.80 | 1.76 $\pm$ 0.06<br>****                                                                      | 32.41 $\pm$ 1.06<br>**** | 92.61  |
|                            | 200 mg | 0.17 $\pm$ 0.00<br>**** | 0.17 | 31.30 $\pm$ 0.80<br>**** | 5.43 $\pm$ 0.14<br>**** | 3.71 | 20.93 $\pm$ 0.64<br>****            | 3.63 $\pm$ 0.11<br>**** | 3.56 | 3.23 $\pm$ 0.23<br>****                                                   | 5.60 $\pm$ 0.39 **** | 13.30 | 2.51 $\pm$ 0.10<br>****                                                                      | 43.55 $\pm$ 1.69<br>**** | 124.44 |



**Supplementary Table 4. Absolute counts of phenotypically defined cell subsets before (fresh) and after 3 days of culture in a bioreactor.** Values represent mean  $\pm$  s.d. (Fresh,  $n = 4$  technical replicates; Microniche,  $n = 4$  biological replicates), # denotes absolute counts. Comparisons with fresh, \*\*\*\* $p < 0.0001$  by unpaired two-tailed Student's  $t$ -test.

| Subpopulations                                                                                                                      | Treatment           |                       |             |
|-------------------------------------------------------------------------------------------------------------------------------------|---------------------|-----------------------|-------------|
|                                                                                                                                     | Fresh               | Microniche            |             |
|                                                                                                                                     | # ( $\times 10^4$ ) | # ( $\times 10^5$ )   | Fold change |
| live cells                                                                                                                          | 1000 $\pm$ 0.00     | 277.4 $\pm$ 4.07 **** | 0.28        |
| CD34 <sup>+</sup>                                                                                                                   | 14.65 $\pm$ 0.45    | 91.40 $\pm$ 3.57 **** | 6.24        |
| CD34 <sup>+</sup> CD38 <sup>-</sup>                                                                                                 | 10.20 $\pm$ 0.56    | 66.02 $\pm$ 1.18 **** | 6.47        |
| CD34 <sup>+</sup> CD38 <sup>-</sup> CD45RA <sup>-</sup> CD90 <sup>+</sup>                                                           | 0.42 $\pm$ 0.03     | 8.74 $\pm$ 0.80 ****  | 20.77       |
| CD34 <sup>+</sup> CD38 <sup>-</sup> CD45RA <sup>-</sup> CD90 <sup>+</sup> CD49 <sup>+</sup>                                         | 0.03 $\pm$ 0.01     | 6.28 $\pm$ 0.56 ****  | 179.29      |
| CD34 <sup>+</sup> CD38 <sup>-</sup> CD45RA <sup>-</sup> CD90 <sup>+</sup> CD49 <sup>low</sup>                                       | 0.03 $\pm$ 0.01     | 6.21 $\pm$ 0.54 ****  | 179.18      |
| CD34 <sup>+</sup> CD38 <sup>-</sup> CD45RA <sup>-</sup> CD90 <sup>+</sup> CD49 <sup>low</sup> CD62L <sup>-</sup> CD133 <sup>+</sup> | 0.03 $\pm$ 0.01     | 3.81 $\pm$ 0.32 ****  | 123.23      |

**Supplementary Table 5. Quantification of the expression of 20 cytokine-cytokine receptor genes after culture with Microniche (*n* = 4 biological replicates).**

| <b>Gene name</b> | <b>Fold change of gene expression</b> |
|------------------|---------------------------------------|
| CXCL8            | 8.23 ± 0.36                           |
| CSF2RA           | 2.71 ± 0.28                           |
| CCL4L2           | 8.24 ± 0.41                           |
| CSF1R            | 3.38 ± 0.16                           |
| CX3CR1           | 5.55 ± 0.21                           |
| CCL4L1           | 7.25 ± 0.15                           |
| CXCL16           | 5.15 ± 0.29                           |
| CCL3L1           | 4.72 ± 0.30                           |
| CD40             | 2.89 ± 0.25                           |
| IL10RA           | 9.16 ± 0.67                           |
| CCL3L3           | 4.00 ± 0.30                           |
| CCL24            | 3.79 ± 0.28                           |
| CCL4             | 5.43 ± 1.05                           |
| CCL22            | 4.07 ± 0.27                           |
| IL21R            | 13.94 ± 1.45                          |
| FLT1             | 3.34 ± 0.68                           |
| IL13RA           | 4.43 ± 0.50                           |
| IL1R1            | 5.08 ± 1.20                           |
| IL1R2            | 9.66 ± 1.31                           |
| PDGFA            | 14.41 ± 2.84                          |

**Supplementary Table 6. Quantification of 40 chemokines from liquid suspension after culture with the control or Microniche (*n* = 3 biological replicates).**

| Chemokines                              | Observed concentration (pg/mL) |                    | Fold change |
|-----------------------------------------|--------------------------------|--------------------|-------------|
|                                         | Control                        | Microniche         |             |
| 6CKine (also known as CCL21)            | 96.80 ± 7.40                   | 160.53 ± 11.24     | 1.66        |
| BCA-1 (also known as CXCL13)            | 2.98 ± 0.52                    | 55.03 ± 12.43      | 18.49       |
| CTACK (also known as CCL27)             | 2.37 ± 0.87                    | 10.20 ± 1.32       | 4.30        |
| ENA-78 (also known as CXCL5)            | 381.26 ± 23.80                 | 917.48 ± 207.27    | 2.41        |
| Eotaxin (also known as CCL11)           | 8.92 ± 0.48                    | 15.25 ± 1.40       | 1.71        |
| Eotaxin-2 (also known as CCL24)         | 35.96 ± 14.93                  | 273.86 ± 17.30     | 7.62        |
| Eotaxin-3 (also known as CCL26)         | 4.19 ± 0.00                    | 11.83 ± 1.87       | 2.82        |
| Fractalkine (also known as CX3CL1)      | 14.44 ± 0.94                   | 52.62 ± 6.52       | 3.64        |
| GCP-2 (also known as CXCL6)             | 8.02 ± 1.12                    | 16.61 ± 0.80       | 2.07        |
| GM-CSF                                  | 42.18 ± 2.66                   | 67.20 ± 6.13       | 1.59        |
| Gro-alpha (also known as CXCL1)         | 55.33 ± 5.20                   | 222.79 ± 39.74     | 4.03        |
| Gro-beta (also known as CXCL2)          | 21.15 ± 3.40                   | 87.20 ± 21.45      | 4.12        |
| I-309 (also known as CCL1)              | 199.17 ± 16.24                 | 911.63 ± 149.67    | 4.58        |
| IFN-gamma                               | 20.16 ± 0.81                   | 46.04 ± 4.07       | 2.28        |
| IL-1 beta                               | 3.24 ± 0.22                    | 8.73 ± 1.30        | 2.69        |
| IL-2                                    | 2.97 ± 0.26                    | 7.63 ± 0.68        | 2.57        |
| IL-4                                    | 12.97 ± 0.46                   | 24.98 ± 0.90       | 1.93        |
| IL-6                                    | 37.01 ± 2.06                   | 287.35 ± 166.53    | 7.76        |
| IL-8 (also known as CXCL8)              | 809.44 ± 187.45                | 7051.01 ± 2227.65  | 8.71        |
| IL-10                                   | 8.46 ± 0.91                    | 19.19 ± 1.44       | 2.27        |
| IL-16                                   | 35.41 ± 4.67                   | 79.15 ± 12.14      | 2.24        |
| IP-10 (also known as CXCL10)            | 96.98 ± 7.18                   | 58.36 ± 1.55       | 0.60        |
| I-TAC (also known as CXCL11)            | 0.51 ± 0.03                    | 0.95 ± 0.12        | 1.87        |
| MCP-1 (also known as CCL2)              | 6.70 ± 1.28                    | 68.99 ± 12.32      | 10.30       |
| MCP-2 (also known as CCL8)              | 0.97 ± 0.05                    | 4.24 ± 0.20        | 4.37        |
| MCP-3 (also known as CCL7)              | 42.61 ± 2.82                   | 97.95 ± 8.64       | 2.30        |
| MCP-4 (also known as CCL13)             | 7.49 ± 0.99                    | 21.03 ± 1.55       | 2.81        |
| MDC (also known as CCL22)               | 595.55 ± 84.36                 | 1809.55 ± 539.01   | 3.04        |
| MIF                                     | 8097.93 ± 378.42               | 17017.71 ± 2056.31 | 2.10        |
| MIG (also known as CXCL9)               | 18.94 ± 1.31                   | 39.61 ± 3.86       | 2.09        |
| MIP-1 alpha (also known as CCL3)        | 10.77 ± 1.19                   | 31.28 ± 1.57       | 2.90        |
| MIP-1 delta (also known as CCL15)       | 6.41 ± 0.69                    | 12.02 ± 1.70       | 1.87        |
| MIP-3 alpha (also known as CCL20)       | 4.39 ± 0.10                    | 16.02 ± 2.56       | 3.65        |
| MIP-3 beta (also known as CCL19)        | 30.21 ± 4.90                   | 66.22 ± 3.31       | 2.19        |
| MPIF-1 (also known as CCL23)            | 112.87 ± 3.68                  | 99.83 ± 0.70       | 0.88        |
| SCYB16 (also known as CXCL16)           | 104.12 ± 1.02                  | 182.05 ± 13.20     | 1.75        |
| SDF-1 alpha+beta (also known as CXCL12) | 79.84 ± 3.58                   | 167.06 ± 12.53     | 2.09        |
| TARC (also known as CCL17)              | 3.68 ± 0.54                    | 13.07 ± 4.00       | 3.55        |
| TECK (also known as CCL25)              | 74.74 ± 3.32                   | 178.71 ± 20.68     | 2.39        |
| TNF-alpha                               | 17.30 ± 0.61                   | 35.19 ± 5.46       | 2.03        |

**Supplementary Table 7. Proportion and absolute counts of phenotypically defined cell subsets before and after culture with or without cytokines.** Values represent mean  $\pm$  s.d. (fresh  $n = 3$  technical replicates; control and cytokines  $n = 4$  biological replicates), % denotes percentage in live cells, # denotes absolute counts. Comparisons with fresh, \* $p < 0.05$ , \*\* $p < 0.01$ , \*\*\* $p < 0.001$ , \*\*\*\* $p < 0.0001$  by unpaired two-tailed Student's  $t$ -test.

| Subpopulations                                                                                                    | Treatment        |                     |                      |                      |                      |                      |
|-------------------------------------------------------------------------------------------------------------------|------------------|---------------------|----------------------|----------------------|----------------------|----------------------|
|                                                                                                                   | Fresh            |                     | Control              |                      | Cytokines            |                      |
|                                                                                                                   | %                | # ( $\times 10^3$ ) | %                    | # ( $\times 10^3$ )  | %                    | # ( $\times 10^3$ )  |
| live cells                                                                                                        |                  | 200 $\pm$ 0.00      |                      | 1601 $\pm$ 87****    |                      | 1756 $\pm$ 134****   |
| CD34 <sup>+</sup>                                                                                                 | 83.17 $\pm$ 0.49 | 166 $\pm$ 0.99      | 61.20 $\pm$ 2.64**** | 980 $\pm$ 42****     | 57.50 $\pm$ 3.04**** | 1013 $\pm$ 53****    |
| CD34 <sup>+</sup> CD38 <sup>-</sup>                                                                               | 3.82 $\pm$ 0.27  | 7.63 $\pm$ 0.54     | 10.98 $\pm$ 1.03**** | 176 $\pm$ 16.49****  | 12.78 $\pm$ 0.30**** | 224 $\pm$ 5.24****   |
| CD34 <sup>+</sup> CD38 <sup>-</sup> CD45RA <sup>-</sup> CD90 <sup>+</sup>                                         | 0.72 $\pm$ 0.16  | 1.43 $\pm$ 0.32     | 1.02 $\pm$ 0.14*     | 16.38 $\pm$ 2.22**** | 1.06 $\pm$ 0.07*     | 18.63 $\pm$ 1.30**** |
| CD34 <sup>+</sup> CD38 <sup>-</sup> CD45RA <sup>-</sup> CD49 <sup>+</sup>                                         | 0.02 $\pm$ 0.01  | 0.03 $\pm$ 0.01     | 0.03 $\pm$ 0.01      | 0.42 $\pm$ 0.10**    | 0.10 $\pm$ 0.04*     | 1.79 $\pm$ 0.70**    |
| CD34 <sup>+</sup> CD38 <sup>-</sup> CD45RA <sup>-</sup> CD49 <sup>low</sup>                                       | 0.02 $\pm$ 0.01  | 0.03 $\pm$ 0.01     | 0.02 $\pm$ 0.01      | 0.40 $\pm$ 0.09***   | 0.09 $\pm$ 0.04*     | 1.63 $\pm$ 0.66**    |
| CD34 <sup>+</sup> CD38 <sup>-</sup> CD45RA <sup>-</sup> CD49 <sup>low</sup> CD62L <sup>-</sup> CD133 <sup>+</sup> | 0.01 $\pm$ 0.00  | 0.02 $\pm$ 0.00     | 0.00 $\pm$ 0.00**    | 0.03 $\pm$ 0.01      | 0.01 $\pm$ 0.01      | 0.21 $\pm$ 0.18      |

**Supplementary Table 8. List of antibodies and viability dye used in flow cytometry.**

| Application                                                                        | Antibody or viability dye | Conjugate   | Clone        | Company    | Catalog number |            |
|------------------------------------------------------------------------------------|---------------------------|-------------|--------------|------------|----------------|------------|
| Analysis and cell sorting of human HSPCs expansion <i>in vitro</i>                 | CD34                      | APC         | 581          | BD         | 555824         |            |
|                                                                                    | CD34                      | FITC        | 561          | BioLegend  | 343604         |            |
|                                                                                    | CD38                      | PE-Cy7      | HIT2         | BD         | 560677         |            |
|                                                                                    | CD45RA                    | APC-H7      | HI100        | BD         | 560674         |            |
|                                                                                    | CD90                      | PerCP-Cy5.5 | 5E10         | BD         | 561557         |            |
|                                                                                    | CD90                      | APC         | 5E10         | BD         | 559869         |            |
|                                                                                    | CD49f                     | PE          | GoH3         | BD         | 555736         |            |
|                                                                                    | CD49f                     | BV510       | GoH3         | BD         | 563271         |            |
|                                                                                    | CD133                     | APC         | W6B3C1       | BD         | 566596         |            |
|                                                                                    | CD62L                     | PE          | DREG-56      | BioLegend  | 304806         |            |
|                                                                                    | DAPI                      | n/a         | n/a          | Sigma      | MBD0015        |            |
| Analysis of long-term culture of human UCB CD34 <sup>+</sup> cells <i>in vitro</i> | CD34                      | APC         | 581          | BD         | 555824         |            |
|                                                                                    | CD38                      | PE-Cy7      | HIT2         | BD         | 560677         |            |
|                                                                                    | CD45RA                    | APC-H7      | HI100        | BD         | 560674         |            |
|                                                                                    | CD90                      | PerCP-Cy5.5 | 5E10         | BD         | 561557         |            |
|                                                                                    | CD49f                     | PE          | GoH3         | BD         | 555736         |            |
|                                                                                    | CD71                      | FITC        | OKT9         | Invitrogen | 11-0719-42     |            |
|                                                                                    | CD110                     | BV421       | 1.6.1        | BD         | 562672         |            |
|                                                                                    | CD41a                     | BV510       | HIP8         | BD         | 563250         |            |
|                                                                                    | DAPI                      | n/a         | n/a          | Sigma      | MBD0015        |            |
| Analysis of mouse HSPCs expansion <i>in vitro</i>                                  | Ter119                    | PE-Cy7      | TER-119      | Invitrogen | 25-5921-82     |            |
|                                                                                    | Gr-1                      |             | RB6-8C5      | Invitrogen | 25-5931-82     |            |
|                                                                                    | CD11b                     |             | M1/70        | Invitrogen | 25-0112-81     |            |
|                                                                                    | B220                      |             | RA3-6B2      | Invitrogen | 25-0452-81     |            |
|                                                                                    | CD3e                      |             | 145-2C11     | Invitrogen | 25-0031-82     |            |
|                                                                                    | CD4                       |             | GK1.5        | Invitrogen | 25-0041-82     |            |
|                                                                                    | CD8a                      |             | 53-6.7       | Invitrogen | 25-0081-81     |            |
|                                                                                    | Sca-1                     |             | PerCP-Cy5.5  | D7         | Invitrogen     | 45-5981-82 |
|                                                                                    | c-Kit                     | APC         | 2B8          | Invitrogen | 17-1171-83     |            |
|                                                                                    | CD34                      | FITC        | RAM34        | Invitrogen | 11-0341-82     |            |
|                                                                                    | CD16/32                   | BV421       | 93           | BioLegend  | 101332         |            |
|                                                                                    | Flt3                      | PE          | A2F10        | Invitrogen | 12-1351-82     |            |
|                                                                                    | Ter119                    | APC-Cy7     | TER-119      | BioLegend  | 116223         |            |
|                                                                                    | Gr-1                      |             | RB6-8C5      | BioLegend  | 108423         |            |
|                                                                                    | CD11b                     |             | M1/70        | BioLegend  | 101226         |            |
|                                                                                    | B220                      |             | RA3-6B2      | BioLegend  | 103224         |            |
|                                                                                    | CD3e                      |             | 145-2C11     | BioLegend  | 100330         |            |
|                                                                                    | CD4                       |             | RM4-5        | BioLegend  | 100526         |            |
|                                                                                    | CD8a                      |             | 53-6.7       | BioLegend  | 100714         |            |
|                                                                                    | CD34                      |             | PE-Cy7       | MEC14.7    | BioLegend      | 119326     |
|                                                                                    | CD150                     | BV421       | TC15-12F12.2 | BioLegend  | 115943         |            |
|                                                                                    | CD48                      | FITC        | HM48-1       | Invitrogen | 11-0481-85     |            |
|                                                                                    | CD229                     | PE          | Ly9ab3       | BioLegend  | 122905         |            |
|                                                                                    | DAPI                      | n/a         | n/a          | Sigma      | MBD0015        |            |
|                                                                                    |                           | mCD45       | PerCP-Cy5.5  | HI30       | BD             | 564105     |

|                                                                                      |                       |                 |              |                |                       |
|--------------------------------------------------------------------------------------|-----------------------|-----------------|--------------|----------------|-----------------------|
| Reconstitution analysis of HSPCs, myeloid cells, B and T lymphocytes, NK cells in BM | hCD45                 | FITC            | HI30         | BD             | 555482                |
|                                                                                      | hCD33                 | APC-Cy7         | P67.6        | BioLegend      | 366614                |
|                                                                                      | hCD19                 | PE              | HIB19        | BD             | 555413                |
|                                                                                      | hCD3                  | BV650           | SK7          | BD             | 563999                |
|                                                                                      | hCD56                 | BV786           | B159         | BD             | 740979                |
|                                                                                      | hCD34                 | APC             | 581          | BD             | 555824                |
|                                                                                      | hCD38                 | PE-Cy7          | HIT2         | BD             | 560677                |
|                                                                                      | hCD110                | BV605           | 1.6.1        | BD             | 743578                |
|                                                                                      | hCD71                 | BV711           | M-A712       | BD             | 563767                |
|                                                                                      | hCD41a                | BV510           | HIP8         | BD             | 563250                |
|                                                                                      | DAPI                  | n/a             | n/a          | Sigma          | MBD0015               |
| Reconstitution analysis of megakaryocytes and erythrocytes in BM                     | mCD45                 | APC-Cy7         | 30-F11       | BD             | 557659                |
|                                                                                      | mCD41                 | APC             | MWRReg30     | BioLegend      | 133914                |
|                                                                                      | mCD42d                | PerCP-Cy5.5     | 1C2          | BioLegend      | 148508                |
|                                                                                      | mCD61                 | BV786           | 2C9.G2       | BD             | 740867                |
|                                                                                      | Ter119                | PE-Cy7          | TER-119      | Invitrogen     | 25-5921-81            |
|                                                                                      | mCD71                 | BV605           | C2           | BD             | 563013                |
|                                                                                      | hCD45                 | FITC            | HI30         | BD             | 555482                |
|                                                                                      | hCD41a                | BV510           | HIP8         | BD             | 563250                |
|                                                                                      | hCD42b                | PE              | HIP1         | BD             | 555473                |
|                                                                                      | hCD61                 | BV650           | VI-PL2       | BD             | 564172                |
|                                                                                      | CD235a                | Alexa Fluor 700 | HIR2 (GA-R2) | Invitrogen     | 56-9987-42            |
|                                                                                      | hCD71                 | BV711           | M-A712       | BD             | 563767                |
|                                                                                      | DAPI                  | n/a             | n/a          | Sigma          | MBD0015               |
| BD Rhapsody Single-Cell Analysis                                                     | <b>Antibody-Oligo</b> | <b>SeqID</b>    | <b>Clone</b> | <b>Company</b> | <b>Catalog number</b> |
|                                                                                      | CD34                  | AHS0061         | 581          | BD             | 940021                |
|                                                                                      | CD38                  | AHS0022         | HIT2         | BD             | 940013                |
|                                                                                      | CD45RA                | AHS0009         | HI100        | BD             | 940011                |
|                                                                                      | CD90                  | AHS0045         | 5E10         | BD             | 940032                |
|                                                                                      | CD49f                 | AHS0119         | GOH3         | BD             | 940160                |

**Supplementary Table 9. Primers for qRT-PCR.**

| <b>Accession number</b> | <b>Primers</b> | <b>Forward (5'-3')</b>  | <b>Reverse (5'-3')</b>  |
|-------------------------|----------------|-------------------------|-------------------------|
| NM_002982               | CCL2           | AAACTGAAGCTCGCACTCTC    | AATCCTGAACCCACTTCTGC    |
| NM_000576               | IL1B           | ATGGACAAGCTGAGGAAGATG   | ACAAAGGACATGGAGAACACC   |
| NM_000616               | CD4            | TCCTGCTTTTCATTGGGCTAG   | CTGCTACATTCATCTGGTCCG   |
| NM_000584               | CXCL8          | ATACTCCAAACCTTTCCACCC   | GTTTCACTGGCATCTTCACTG   |
| NM_005211               | CSF1R          | TGAAGGTGGCTGTGAAGATG    | CGAGGTGGATGTTCTTATAGTCG |
| NM_001100812            | CXCL16         | CATCTTCATCCTCACC GCAG   | AAGCCACAGTTTACCCTCAC    |
| NM_001558               | IL10RA         | GCAGTGTGAACCTAGAGATCC   | CTCTTTAGACCACATCCCCTTG  |
| NM_002984               | CCL4           | ACCAATACCATGAAGCTCTGC   | TTCAGTTCCAGGTCATACACG   |
| NM_021798               | IL21R          | GTATGAAGAGCTGAAGGACGAG  | CAGGGTCTTCGTAATCTGAGC   |
| NM_001560               | IL13RA1        | CGCAATTCCACACTCTACATAAC | CTCCATCACTGAGAGGCTTTC   |
| NM_004633               | IL1R2          | AAAATGACTCTGCTAGGACGG   | TGAGATGAACGGCAGGAAAG    |
| NM_006140               | CSF2RA         | TTAATGAACTGTACCTGGGCG   | TTGCTGGGAGGGTTGAATC     |
| NM_001337               | CX3CR1         | GTCTCTGGTAAAGTCTGAGCAG  | ATGGCAAAGATGACGGAGTAG   |
| NM_021006               | CCL3L1         | ATCACCTGCTCCCAATCATG    | CACTGACGTATTTCTGGACCC   |
| NM_001001437            | CCL3L3         | ATCACCTGCTCCCAATCATG    | CACTGACGTATTTCTGGACCC   |
| NM_002990               | CCL22          | GATTACGTCCGTTACCGTCTG   | GATGGAGATCAGGGAATGCAG   |
| NM_002019               | FLT1           | CTCAACTCCTGCCTTCTCTG    | CCCCGACTCCTTACTTTTACTG  |
| NM_000877               | IL1R1          | GCATCCTACACATACTTGGGC   | CTAGCACTGGGTCATCTTCATC  |
| NM_002607               | PDGFA          | CGTAGGGAGTGAGGATTCTTTG  | CAGATCAGGAAGTTGGCGG     |
| NM_001291468            | CCL4L2         | CCGCCTGCTGCTTTTCTTAC    | TTGCCTACCACAGCTGGC      |
| NM_207007               | CCL4L1         | AGCACTCTCAGCACCAATG     | TTCAGTTCCAGGTCATACACG   |
| NM_001250               | CD40           | AAGCGAATTCCTAGACACCTG   | CGAAAGCAGATGACACATTGG   |
| NM_002991               | CCL24          | TTCTGTTCCCTTGGTGTCTGTG  | TTCTGCTTGGCGTCCAG       |
| NM_000609               | CXCL12         | GAGCCAACGTCAAGCATCTG    | CGGGTCAATGCACACTTGTC    |
| NM_001008540            | CXCR4          | GTCCATTCTTTGCCTTTTTG    | ACTTGTCGGTCATGCTTCTC    |
| NM_001123041            | CCR2           | ATTCTCCTGAACACCTTCCAG   | TGACTTTCCTTTTCCACGACC   |
